# Supplementary material for: Impact of breastfeeding on morbidity during the first two years of life
Source: Research Square preprint supplement (doi:10.21203/rs.3.rs-8069375/v1), 2025-12-02

**ANNEXES**

**Table 1S.**

*Hospital admissions due to infectious pathology by type of breastfeeding and visit.*

|  |  | **Tipo de lactancia** | | | |
| --- | --- | --- | --- | --- | --- |
|  |  | **EBF** | **MF** | **FF_postBF** | **FF_initial** |
| **< 15 days** | n | 1384 | 448 | 53 | 161 |
| % admissions | 0.43 | 2.01 | 0.00 | 0.00 |
| **1 months** | n | 1215 | 404 | 118 | 167 |
| % admissions | 1.73 | 1.24 | 3.39 | 2.40 |
| **2 months** | n | 1152 | 332 | 212 | 162 |
| % admissions | 2.60 | 1.81 | 4.72 | 4.32 |
| **6 months** | n | 677 | 401 | 481 | 170 |
| % admissions | 1.62 | 1.25 | 2.29 | 2.32 |
|  |  | **BF_ complemented** | | **Formula feeding** | |
| **12 months** | n | 628 | | 908 | |
| % admissions | 2.55 | | 3.41 | |
| **18 months** | n | 390 | | 887 | |
| % admissions | 2.05 | | 2.03 | |
| **24 months** | n | 244 | | 848 | |
| % admisisons | 1.23 | | 2.24 | |

**Table 2S.**

*Visit-by-Visit Income*

|  | **Visit-by-Visit Income** | | | |
| --- | --- | --- | --- | --- |
|  | **No ajusted** | | **Ajusted** | |
|  | **OR [CI95%]** | **p** | **OR [CI95%]** | **p** |
| **<15 days** |  |  |  |  |
| **EBF (ref)** | - | - | - | - |
| **FF_initial** | - | - | - | - |
| **FF_postBF** | - | - | - | - |
| **MF** | 4.71 [1.69 - 14.10] | **0.003** | 3.59 [1.17 – 11.36] | **0.024** |
| **1 month** |  |  |  |  |
| **EBF (ref)** | - | - | - | - |
| **FF_initial** | 1.08 [0.32 – 2.80] | 0.889 | 1.07 [0.31 – 2.77] | 0.905 |
| **FF_postBF** | 1.56 [0.45 – 4.07] | 0.417 | 1.57 [0.46 – 4.11] | 0.407 |
| **MF** | 0.89 [0.37 – 1.88] | 0.771 | 0.91 [0.38 – 1.95] | 0.827 |
| **2 months** |  |  |  |  |
| **EBF (ref)** | - | - | - | - |
| **FF_initial** | 1.44 [0.58 – 3.11] | 0.388 | 1.66 [0.66 – 3.64] | 0.237 |
| **FF_postBF** | 2.25 [1.15 – 4.18] | **0.013** | 2.70 [1.36 – 5.10] | **0.003** |
| **MF** | 0.79 [0.34 – 1.63] | 0.547 | 1.01 [0.43 – 2.12] | 0.989 |
| **6 months** |  |  |  |  |
| **EBF (ref)** | - | - | - | - |
| **FF_initial** | 1.46 [0.40 – 4.33] | 0.522 | 1.41 [0.38 – 4.19] | 0.565 |
| **FF_postBF** | 1.42 [0.60 – 3.34] | 0.418 | 1.21 [0.50 - 2.92] | 0.665 |
| **MF** | 0.76 [0.24 – 2.12] | 0.621 | 0.71 [0.22 – 1.99] | 0.537 |
| **12 months** |  |  |  |  |
| **BF_complemented a (ref)** | - | - | - | - |
| **Formula feeding** | 1.35 [0.74 – 2.55] | 0.334 | 1.25 [0.67 - 2.42] | 0.490 |
| **18 months** |  |  |  |  |
| **BF_complemented (ref)** | - | - | - | - |
| **Formula feeding** | 0.99 [0.44 – 2.43] | 0.980 | 0.90 [0.40 – 2.23] | 0.806 |
| **24 months** |  |  |  |  |
| **BF_complemented (ref)** | - | - |  |  |
| **Formula feeding** | 1.84 [0.62 – 7.88] | 0.329 | 1.92 [0.64 – 8.25] | 0.300 |
| *Abbreviation:* Exclusive breastfeeding (EBF), Formula feeding from birth (FF_initial); Formula feeding After BF discontinuation (FF_postBF); Mixed feeding (MF); complementary breastfeeding (BF_complemented); formula feeding (FF). *Ref: reference category; OR: Odds Ratio. CI: 95% confidence interval for the OR; p = p-value (α = 0.05). (-) Number of pathologies very low, not measurable.*  *All coefficients are adjusted for having siblings (yes/no) and attending a childcare centre (yes/no).* | | | | |

**Table 3S.**

*Most frequent processes by visits and in relation to the type of feeding*

| *.* | **Common conditions** | | | | | | | |
| --- | --- | --- | --- | --- | --- | --- | --- | --- |
|  | **General** | | **Colic** | | **Constipation** | | **Regurgitation** | |
|  | **OR [CI95%]** | **p** | **OR [CI95%]** | **p** | **OR [CI95%]** | **p** | **OR [CI 95%]** | **p** |
| **<15 days** |  |  |  |  |  |  |  |  |
| **EBF (ref)** | **-** | **-** | **-** | **-** | **-** |  | **-** | **-** |
| **FF_initial** | **1.59 [1.11, 2.26]** | **0.010** | **1.44 [0.83-2.35]** | **0.169** | **10.96 [4.82 – 25.39]** | **<0.001** | **0,91 [0,51-1,53]** | **0,748** |
| **FF_postBF** | **2.08 [1.16, 3.65]** | **0.012** | **3.85 [1.97-7.14]** | **<0.001** | **13.00 [3.97 – 37.28]** | **<0.001** | **1,06 [0,40-2,33]** | **0,898** |
| **MF** | 1.51 [1.19, 1.92] | 0.001 | 1.60 [1.14-2.22] | 0.006 | 2.56 [1.03 – 6.22] | 0.038 | 1,02 [0,72-1,45] | 0,919 |
| **1 months** |  |  |  |  |  |  |  |  |
| **EBF (ref)** | **-** | **-** | **-** | **-** | **-** | **-** | **-** | **-** |
| **FF_initial** | **1.27 [0.92, 1.76]** | **0.144** | **1.32 [0.91 – 1.89]** | **0.139** | **9.28 [5.38 – 16.07]** | **<0.001** | **0,49 [0,28-0,80]** | **0,007** |
| **FF_postBF** | **1.44 [0.98, 2.10]** | **0.059** | **1.71 [1.13 – 2.55]** | **0.010** | **5.25 [2.56 – 10.25]** | **<0.001** | **0,88 [0,52-1,42]** | **0,614** |
| **MF** | **1.06 [0.84, 1.33]** | **0.615** | **1.04 [0.79 – 1.35]** | **0.792** | **3.52 [2.09 – 5.98]** | **<0.001** | **0,81 [0,59-1,09]** | **0,175** |
| **2 months** |  |  |  |  |  |  |  |  |
| **EBF (ref)** | **-** | **-** | **-** | **-** | **-** | **-** | **-** | **-** |
| **FF_initial** | **0.88 [0.58, 1.30]** | **0.535** | **1.89 [0.99 – 3.38]** | **0.042** | **1.89 [0.99, 3.38]** | **0.042** | **0,88 [0,58-1,30]** | **0,535** |
| **FF_postBF** | **1.31 [0.94, 1.81]** | **0.109** | **2.08 [1.19 – 3.49]** | **0.007** | **2.08 [1.19, 3.49]** | **0.007** | **1,31 [0,94- 1,81]** | **0,109** |
| **MF** | **0.82 [0.60, 1.11]** | **0.205** | **2.20 [1.39 – 3.43]** | **0.001** | **2.20 [1.39, 3.43]** | **0.001** | **0,82 [0,60- 1,11]** | **0,205** |
| **6 months** |  |  |  |  |  |  |  |  |
| **EBF (ref)** | **-** | **-** | **-** | **-** | **-** | **-** | **-** | **-** |
| **FF_initial** | 1.50 [1.01, 2.21] | 0.042 | 1.86 [0.83 – 3.91] | 0.113 | 1.50 [0.79 – 2.73] | 0.197 | 1,28 [0,70- 2,23] | 0,396 |
| **FF_postBF** | 1.64 [1.25, 2.16] | <0.001 | 1.50 [0.82 – 2.73] | 0.186 | 1.41 [0.89 -2.21] | 0.139 | 1,74 [1,19- 2,56] | 0,005 |
| **MF** | 1.31 [0.97, 1.77] | 0.074 | 1.24 [0.63 – 2.37] | 0.525 | 1.58 [0.99 – 2.50] | 0.054 | 1,14 [0,73-1,76] | 0,566 |
| **12 months** |  |  |  |  |  |  |  |  |
| **EBF (ref)** | **-** | **-** | **-** | **-** | **-** | **-** | **-** | **-** |
| **Formula feeding** | 0.85 [0.66, 1.11] | 0.238 | - | - | 0.79 [0.52, 1.21] | 0.280 | 1,51 [0,79- 3,02] | 0,229 |
| **18 months** |  |  |  |  |  |  |  |  |
| **EBF (ref)** | **-** | **-** | **-** | **-** | **-** | **-** | **-** | **-** |
| **Formula feeding** | **1.19 [0.86, 1.66]** | **0.302** | **-** | **-** | **2.23 [1.28, 4.18]** | **0.008** | **-** | **-** |
| **24 months** |  |  |  |  |  |  |  |  |
| **EBF (ref)** | **-** | **-** | **-** | **-** | **-** | **-** | **-** | **-** |
| **Formula feeding** | 1.14 [0.66, 2.08] | 0.643 | - | - | 1.14 [0.66, 2.08] | 0.643 | - | - |

**Table 4S.**

*Influence of exclusive breastfeeding on different conditions at 12, 18, and 24 months (not adjusted for confounding variables).*

|  | **12 months** | | | | **18 months** | | | | | **24 months** | | | | |
| --- | --- | --- | --- | --- | --- | --- | --- | --- | --- | --- | --- | --- | --- | --- |
|  | **EBF (%)** | | **RR CI95%** |  | **EBF (%)** | | **RR** | **CI95%** |  | **EBF (%)** | | **RR** | **CI95%** |  |
| **Diseases** | **YES** | **NO** |  | **p** | **YES** | **NO** |  | | **p** | **YES** | **NO** |  | | **p** |
| **General** | 34.21 | 65.79 | 0.79 [0.75;0.84] | **<0.001** | 37.83 | 62.17 | 0.86 [0.82; 0.92] | | **<0.001** | 36.82 | 63.18 | 0.88 [0.82; 0.94] | | **<0.001** |
| **Bronchiolitis** | 30.82 | 69.18 | 0.67 [0.52; 0.86] | **0.002** | 38.18 | 61.82 | 0.88 [0.59; 1.28] | | 0.505 | 34.15 | 65.85 | 0.78 [0.49; 1.22] | | 0.288 |
| **Bronchitis** | 24.87 | 75.13 | 0.50 [0.36; 0.69] | **<0.001** | 33.67 | 66.33 | 0.72 [0.53; 0.97] | | **0.031** | 40.80 | 59.20 | 1.04 [0.76; 1.40] | | 0.808 |
| **Conjunctivitis** | 33.80 | 66.20 | 0.77[0.62; 0.96] | **0.021** | 34.66 | 65.34 | 0.75 [0.60; 0.94] | | **0.015** | 28.07 | 71.93 | 0.59 [0.44; 0.78] | | **<0.001** |
| **Contact/allergic dermatitis** | 37.80 | 62.20 | 0.93 [0.75; 1.14] | 0.470 | 39.86 | 60.14 | 0.94 [0.74; 1.19] | | 0.613 | 39.5 | 60.5 | 0.98 [0.77; 1.25] | | 0.890 |
| **Exanthematous diseases** | 41.06 | 58.94 | 1.06 [0.80; 1.39] | 0.704 | 41.70 | 58.30 | 1.02 [0.78; 1.32] | | 0.905 | 36.77 | 63.23 | 0.88 [0.63; 1.21] | | 0.426 |
| **Dental/gum diseases** | 34.48 | 65.52 | 0.80 [0.46; 1.35] | 0.412 | 41.51 | 58.49 | 1.01 [0.58; 1.73] | | 0.977 | 46.55 | 53.45 | 1.31 [0.78; 2.20] | | 0.303 |
| **Wheezing ep** | 25.11 | 74.89 | 0.51 [0.37; 0.68] | **<0.001** | 32.29 | 67.71 | 0.68 [0.51; 0.89] | | **0.007** | 39.35 | 60.65 | 0.98 [0.74; 1.28] | | 0.868 |
| **Acute pharyngotonsillitis** | 32.20 | 67.80 | 0.72 [0.48; 1.05] | 0.095 | 42.13 | 57.87 | 1.03 [0.77; 1.39] | | 0.823 | 36.41 | 63.59 | 0.86 [0.64; 1.16] | | 0.334 |
| **AGE** | 32.15 | 67.85 | 0.72 [0.58; 0.88] | **0.002** | 37.12 | 62.88 | 0.84 [0.69; 1.01] | | 0.069 | 38.11 | 61.89 | 0.93 [0.75; 1.14] | | 0.481 |
| **Laryngitis** | 33.96 | 66.04 | 0.78 [0.43; 1.39] | 0.389 | 34.88 | 65.12 | 0.76 [0.40; 1.41] | | 0.396 | 42.11 | 57.89 | 1.10 [0.57; 2.08] | | 0.778 |
| **Pneumonia** | 32.35 | 67.65 | 0.72 [0.34; 1.45] | 0.379 | 55.56 | 44.44 | 1.78 [0.83; 3.87] | | 0.138 | 43.33 | 56.67 | 1.15 [0.55; 2.36] | | 0.702 |
| **AOM** | 27.6 | 72.4 | 0.58 [0.46; 0.72] | **<0.001** | 34.61 | 65.39 | 0.75 [0.62; 0.91] | | **0.004** | 34.12 | 65.88 | 0.78 [0.62; 0.97] | | **0.030** |
| **Common cold** | 37.6 | 62.4 | 0.91 [0.83; 0.99] | 0.043 | 38.43 | 61.57 | 0.89 [0.81; 0.97] | | **0.012** | 36.26 | 63.74 | 0.86 [0.77; 0.95] | | **0.005** |
| | Abbreviations: RR: Relative Risk; 95% CI: 95% Confidence Interval for the RR; p = p-value (α = 0.05). | | --- | | | | | | | | | | | | | | | |

**Table 5S.**

*Multivariate analysis at 18-month visit: pathologies / EBF_6m.*

| **Diseases (total)** | | | |
| --- | --- | --- | --- |
|  | **RR** | **CI** | **p** |
| ***Intercept*** | 3,81 | 3,63-4,00 | **<0,001** |
| ***Feeding: EBF 6m*** | 0,88 | 0,82-0,93 | **<0,001** |
| ***Siblings (yes)*** | 1,07 | 1,01-1,13 | 0,027 |
| **Daycare attendance *(yes)*** | 1,17 | 1,09-1,27 | **<0,001** |

**Table 6S.**

*Multivariate analysis at 24-month visit: pathologies / EBF_6m.*

| **Diseases (total)** | | | |
| --- | --- | --- | --- |
|  | **RR** | **CI** | **p** |
| ***Intercept*** | 3,90 | 3,70-4,11 | **<0,001** |
| ***Feeding: EBF 6m*** | 0,87 | 0,81-0,93 | **<0,001** |
| ***Siblings (yes)*** | 0,99 | 0,93-1,06 | 0,875 |
| **Daycare attendance *(yes)*** | 0,92 | 0,84-1,01 | 0,094 |

**Fig 1S.**

*Percentage of cases grouped by processes in all visits*


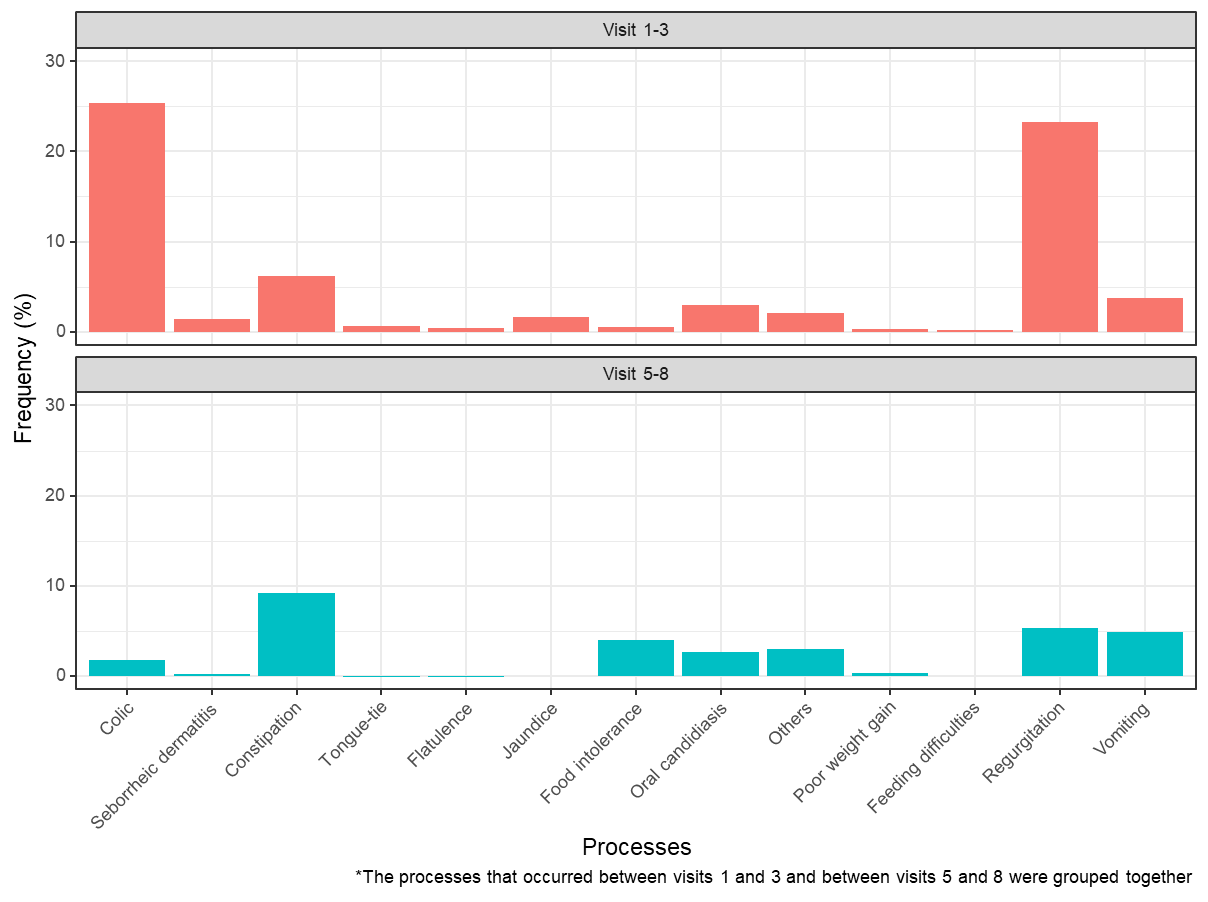


**Figure 2S.**

*Frequency of each condition out of the total at the 12-, 18-, and 24-month visits.*


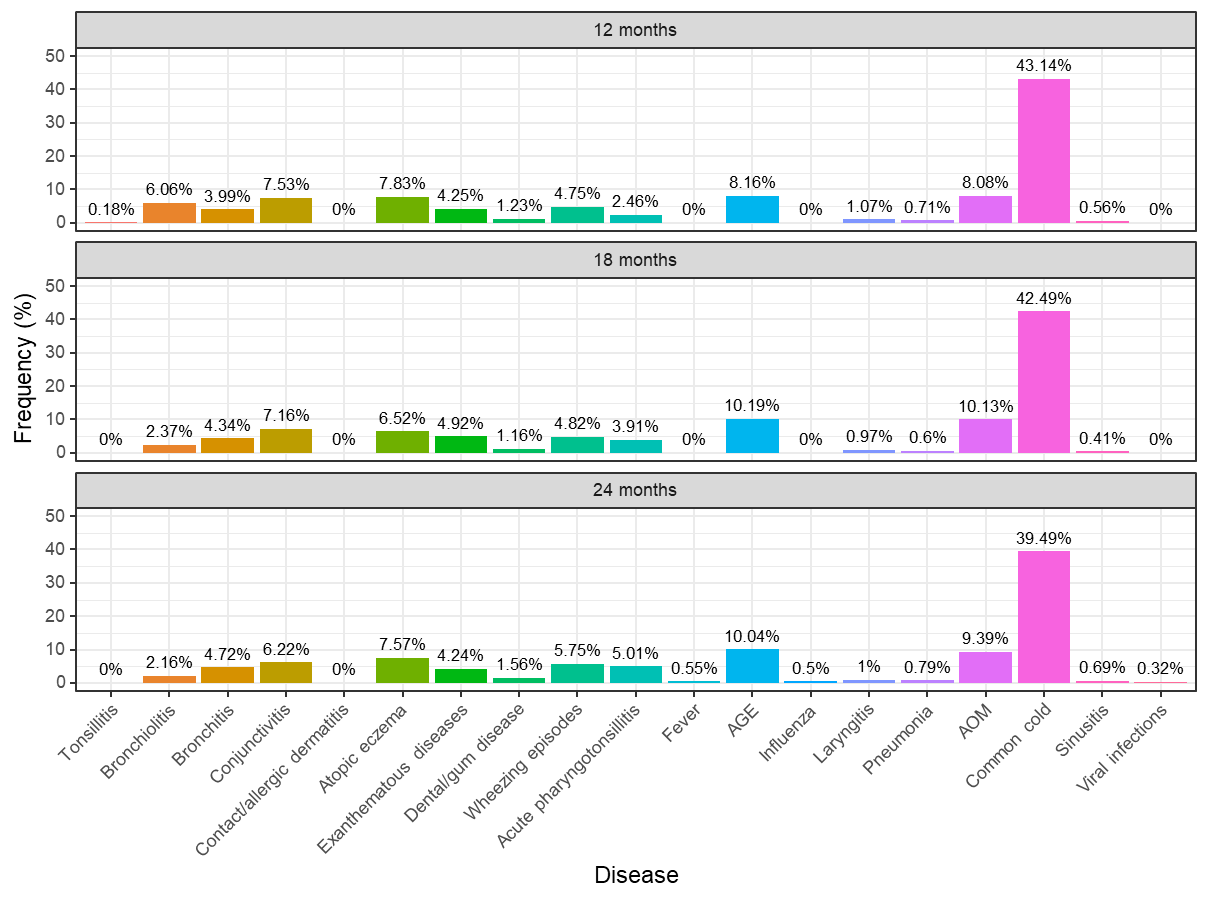

Supplement: Supplementary file 1 [file 224940cda05967acf462fd7a.docx]
